# Supplementary material
Source: publisher figshare collection journal article supplement (https://scielo.figshare.com/articles/dataset/_/5670250)
Supplement: Supplementary file 1 [file Table_1.xls]

## Sheet: Table_1
<b><strong>Biomarker/ Bioindicator</strong></b>	<b><strong>F</strong></b>	<b><strong><em>P</em></strong></b>	<b><strong>Tukey differences</strong></b>
EROD	4.97	0.0030<a><sup>**</sup></a>	4 (river downstream reservoir) > 2 (upper reservoir)
MN	2.06	0.1287	ns
HSI	3.20	0.0368<a><sup>*</sup></a>	1 (river upstream reservoir) >2 (upper reservoir)
GSI	4.65	0.0079<a><sup>**</sup></a>	1 (river upstream reservoir) > 4 (river downstream reservoir)
CF	2.85	0.0511	ns
